# Supplementary material for: Dual-fluorophore ratiometric pH nanosensor with tuneable pKa and extended dynamic range
Source: Royal Society of Chemistry journal article supplement (doi:10.1039/c1an15042a), 2011-01-01
Supplement: c1an15042a.pdf [file c1an15042a.pdf]

1 Electronic Supplementary Information

## 2 **Dual-Fluorophore Ratiometric pH Nanosensor with Tuneable** 3 **pK<sub>a</sub> and Extended Dynamic Range**

4 **Veeran M Chauhan, Gary R Burnett and Jonathan W Aylott**

### 5 **Supplementary materials**

#### 6 **Nanosensors**

7 Acrylamide 99% minimum, ammonium persulfate (APS), dioctyl sulfosuccinate sodium salt (AOT) and N,N,N,N-  
8 tetramethylethylenediamine (TEMED) were purchased from Sigma-Aldrich (Gillingham, United Kingdom).  
9 N,N'-methylenebis(acrylamide) and Brij 30® were obtained from Fluka Analytical (Gillingham, United Kingdom). Hexane  
10 HPLC grade and Ethanol analytical grade were obtained from Fisher Scientific (Loughborough, United Kingdom). Argon  
11 gas acquired from BOC Gases (Manchester, United Kingdom). Spectra/ Por® dialysis 6-8000 MWCO tubing purchased  
12 from Spectrum Laboratories, Inc. (California, United States of America). Deionised water (18.2 MΩ) generated by Maxima  
13 HPLC grade USF Elga.

#### 14 **Dyes**

15 Fluorescein isothiocyanate dextran (FITC-D) was obtained from Sigma-Aldrich (Gillingham, United Kingdom), where as  
16 Oregon Green® succinimidyl ester, 5-(and-6)-carboxytetramethylrhodamine succinimidyl ester and amino dextran 10000  
17 MW were obtained from Invitrogen™ (Paisley, United Kingdom).

#### 18 **Buffer solutions**

19 Sodium phosphate dibasic (Na<sub>2</sub>HPO<sub>4</sub>), citric acid monohydrate and sodium borate decahydrate were obtained from Sigma-  
20 Aldrich (Gillingham, United Kingdom).

#### 21 **Equipment**

22 Fluorescence, dynamic light scattering, and pH measurements were taken using Varian Cary Eclipse fluorescence  
23 spectrophotometer, Viscotek (802) and Jenway 3510 pH meter, respectively. SigmaPlot® (11.0) was utilized to analyze the  
24 data generated.

### 25 **Supplementary methods**

#### 26 **Dye conjugation**

27 The method for dye to dextran conjugation was adapted from Zen et al.<sup>1</sup> Oregon Green® succinimidyl ester (0.005 g, 9.816  
28 x 10<sup>-6</sup> mol) and amino dextran 10000 MW (0.020 g, 2 x 10<sup>-6</sup> mol) were dissolved in a sodium borate decahydrate buffer (5  
29 ml, 0.05 M), adjusted to pH 9. The solution was initially stirred at room temperature for 3 hours, followed by 21 hours at 4  
30 °C. The product, Oregon Green dextran (OG-D) was recovered through dialysis with deionised water, using 6-8000 MW  
31 size exclusion tubing, and freeze dried overnight to yield OG-D.

32 The conjugation method was replicated for 5-(and-6)-carboxytetramethylrhodamine succinimidyl ester (0.005 mg, 9.478 x  
33 10<sup>-6</sup> mol), to yield for 5-(and-6)-carboxytetramethylrhodamine dextran (TAMRA-D).

#### 34 **Preparation of nanosensors**

35 Brij 30® (3.080 g, 8.508 mmol), AOT (1.590 g, 3.577 mmol) and deoxygenated hexane (42 ml) were stirred under argon for  
36 10 minutes. Acrylamide (0.540 g, 7.579 mmol), N'-methylenebis(acrylamide) (0.160 g, 1.307 mmol), OG-D (20 µl, 5mg/ ml)  
37 and TAMRA-D (90 µl, 5mg/ml) were dissolved in deionised water, made up to 2 ml. This solution was added to the stirring  
38 hexane surfactant solution and allowed to deoxygenate for a further 10 minutes. APS (30 µl, 10% w/v) and TEMED (15 µl,  
39 0.1 mmol) were added to the stirring solution to initiate polymerisation. The mixture was left to stir for 2 hours under argon  
40 at room temperature. The resultant solution was a transparent solution. Hexane was removed via rotary evaporation. Ethanol  
41 (50 ml) was added to the suspension, producing a white opaque suspension. The suspension was washed using centrifugation  
42 (10 times, 6000 rpm, 10 minutes), using a Hermle (Z300) centrifuge. The pellet was light pink in colour, indicating the  
43 presence of TAMRA-D dye. The resultant solid was dried using vacuum filtration (200 nm pore filter, Sartorius Stedim  
44 Biotech) and left overnight in a desiccator. Yield based on starting amounts of acrylamide and bisacrylamide 60 %.

45 The  $pK_a$  of the nanosensors was adjusted by increasing the ratio of FITC-D with respect to OG-D, in the pH sensitive  
 46 fluorophore proportion of the aqueous phase of the micro-emulsion during nanosensor preparation, as described in Table 1.

| Percentage FITC-D with respect to OG-D (%) | Volume of pH sensitive fluorophores in 5 mg/ ml solutions |                 | $pK_a$ (mean, n=3)) | Effective dynamic range (mean, n=3) |
|--------------------------------------------|-----------------------------------------------------------|-----------------|---------------------|-------------------------------------|
|                                            | FITC-D ( $\mu$ L)                                         | OG-D ( $\mu$ L) |                     |                                     |
| 0                                          | 0                                                         | 20              | 4.81                | 1.09                                |
| 25                                         | 5                                                         | 15              | 5.04                | 1.54                                |
| 50                                         | 10                                                        | 10              | 5.54                | 2.01                                |
| 75                                         | 15                                                        | 5               | 5.9                 | 1.76                                |
| 100                                        | 20                                                        | 0               | 6.38                | 1.27                                |

47 **Table 1:** Volumes of FITC-D and OG-D used to tune pH sensitive nanosensors.

### 48 Buffer solutions

49 Universal buffer solutions of pH ranging between 2.5 to 8 were created using stock solutions of  $Na_2HPO_4$  (200 ml, 0.2 M)  
 50 and citric acid monohydrate (200 ml, 0.1 M). Volumes of each stock solution were taken as shown in Table 2 and diluted to  
 51 40 ml with deionised water.

52

| $Na_2HPO_4$ 0.2 M (ml) | Citric acid monohydrate 0.1 M (ml) | Buffer Solutions (pH) Data Set 1 | Buffer Solutions (pH) Data Set 2 | Buffer Solutions (pH) Data Set 3 |
|------------------------|------------------------------------|----------------------------------|----------------------------------|----------------------------------|
| 2.16                   | 17.84                              | 2.53                             | 2.52                             | 2.62                             |
| 4.08                   | 15.92                              | 3.04                             | 3.05                             | 3.10                             |
| 6.04                   | 13.96                              | 3.51                             | 3.51                             | 3.56                             |
| 7.72                   | 12.28                              | 4.02                             | 4.08                             | 4.09                             |
| 9.00                   | 10.90                              | 4.52                             | 4.55                             | 4.57                             |
| 10.28                  | 9.72                               | 5.02                             | 5.05                             | 5.09                             |
| 11.36                  | 8.64                               | 5.53                             | 5.53                             | 5.56                             |
| 12.84                  | 7.16                               | 6.01                             | 6.08                             | 6.13                             |
| 14.20                  | 5.80                               | 6.52                             | 6.49                             | 6.52                             |
| 17.44                  | 2.60                               | 7.01                             | 7.01                             | 7.05                             |
| 17.98                  | 2.03                               | 7.52                             | 7.48                             | 7.50                             |
| 19.53                  | 0.48                               | 7.99                             | 8.02                             | 8.09                             |

53

54

55 **Table 2:** Volumes of  $Na_2HPO_4$  and citric acid were diluted to 40 ml to produce buffer solutions between pH 2.5 and 8.

### 56 Modelling the response of pH-sensitive nanosensors

57 The pH calibration curve was modelled on Equation 1. <sup>2, 3</sup> Here  $I$ ,  $I_{max}$  and  $I_{min}$  describe the experimental, maximum and  
 58 minimum ratio response of a sensor, respectively. The slope factor 'b' ( $\ln$  (1/ gradient)), represents the sensitivity of the  
 59 sensor to changes in pH. Rearrangement of Equation 1, permits calculation of the pH (Equation 2) and  $pK_a$  (Equation 3)  
 60 from experimentally determined fluorescence intensity measurements.

61 
$$1) I = I_{min} + \frac{I_{max} - I_{min}}{1 + e^{\frac{pK_a - pH}{b}}}$$

62

63 
$$2) pH = pK_a - \ln \left( \frac{I_{max} - I_{min}}{I - I_{min}} - 1 \right)^b$$

64

65 
$$3) pK_a = pH + \ln \left( \frac{I_{max} - I_{min}}{I - I_{min}} - 1 \right)^b$$

66 Inputting constants  $\alpha$ ,  $\beta$ , and  $\gamma$  simplifies Equation 1 to generate Equation 4. Equations 5 and 6 model the first and second  
 67 derivatives of the calibration curves, respectively. The second derivative permits the calculation of the effective dynamic  
 68 range. The effective dynamic range is calculated through subtraction of the pH values corresponding to the minima and  
 69 maxima points using a graphical representation of the second derivative. Data presented in Figure 1 and 2a are produced  
 70 from calibrations made in data set 1, Figure 2b is produced from calibrations of all three data sets and Figure 3 is produced  
 71 using data set 2.  
 72

$$\alpha = I_{max} - I_{min}$$

$$\beta = e^{\gamma pK_a}$$

$$\gamma = \frac{1}{b}$$

$$4) I = I_{min} + \frac{\alpha}{1 + \beta e^{-\gamma pH}}$$

$$5) \frac{dI}{dpH} = \frac{\gamma \alpha \beta e^{-\gamma pH}}{(1 + \beta e^{-\gamma pH})^2}$$

$$6) \frac{d^2I}{dpH^2} = \frac{\gamma^2 \alpha \beta e^{-\gamma pH} (\beta e^{-\gamma pH} - 1)}{(1 + \beta e^{-\gamma pH})^3}$$

74  
75  
76  
77  
78  
79  
80  
81

## 82 Dynamic light scattering

83

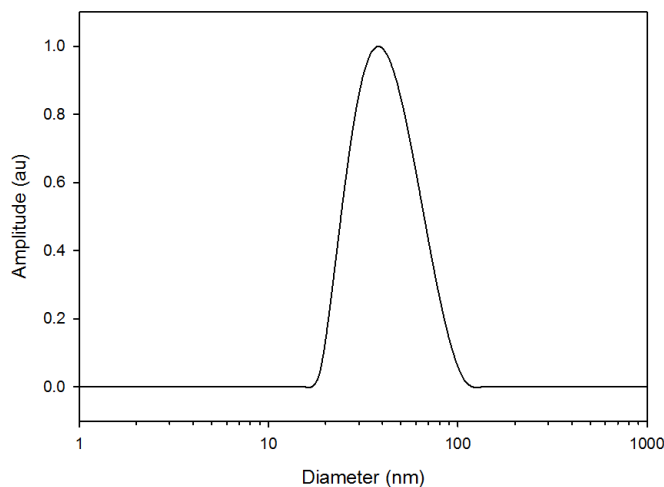

84

85 **Figure A:** DLS intensity distribution of FITC-D, OG-D (1:1 ratio) and TAMRA-D nanosensors, averaged over 100  
 86 measurements each 3 seconds in length at 25 °C and 10 % laser power). Particles have a mean hydrodynamic diameter of  
 87 43.8 nm.  
 88

## 89 Supplementary references

- 90 1. K. Zen, J. Biwersi, N. Periasamy and A. S. Verkman, *Journal of Cell Biology*, 1992, **119**, 99-110.
- 91 2. D. W. Hosmer and S. Lemeshow, *Applied Logistic Regression*, John Wiley & Sons, Massachusetts, 1989.
- 92 3. A. Delean, P. J. Munson and D. Rodbard, *American Journal of Physiology*, 1978, **235**, E97-E102.

93  
94
